# Supplementary material
Source: PubMed Central journal article supplement (PMC11027710)
Supplement: 262_2020_2609_MOESM1_ESM.pdf [file 262_2020_2609_MOESM1_ESM.pdf]

## Supplement Figure Legends

**S-Figure 1. Alteration landscape of the cyclin-CDK4/6 pathway in bladder cancer.** The genomic information of 413 bladder cancer specimens were analyzed for alterations of seven genes along the cyclin-CDK4/6 pathway: CDK4, CDK6, CCND1, CCND3, CDKN2A, CDKN2B and RB1. Each vertical bar represents one patient.

**S-Figure 2. Palbociclib affected cell growth related proteins in bladder PDX models. A and B.** Western blot analysis of tumors obtained three days after palbociclib treatment. The expression of p-Rb and p-Akt were suppressed in treatment group. However, the expression of p-ERK, CDK4, CDK6, cyclin D1, cyclin D3, Cleaved caspase-3 were not changed.

# S-Figure 1

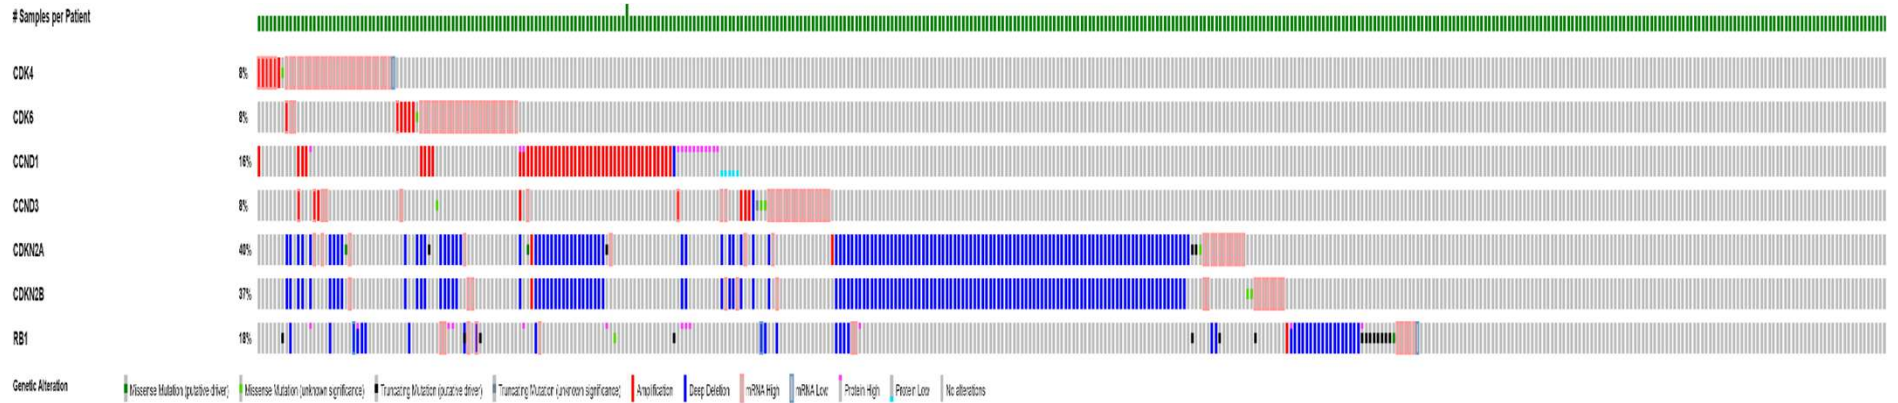

S-Figure 2

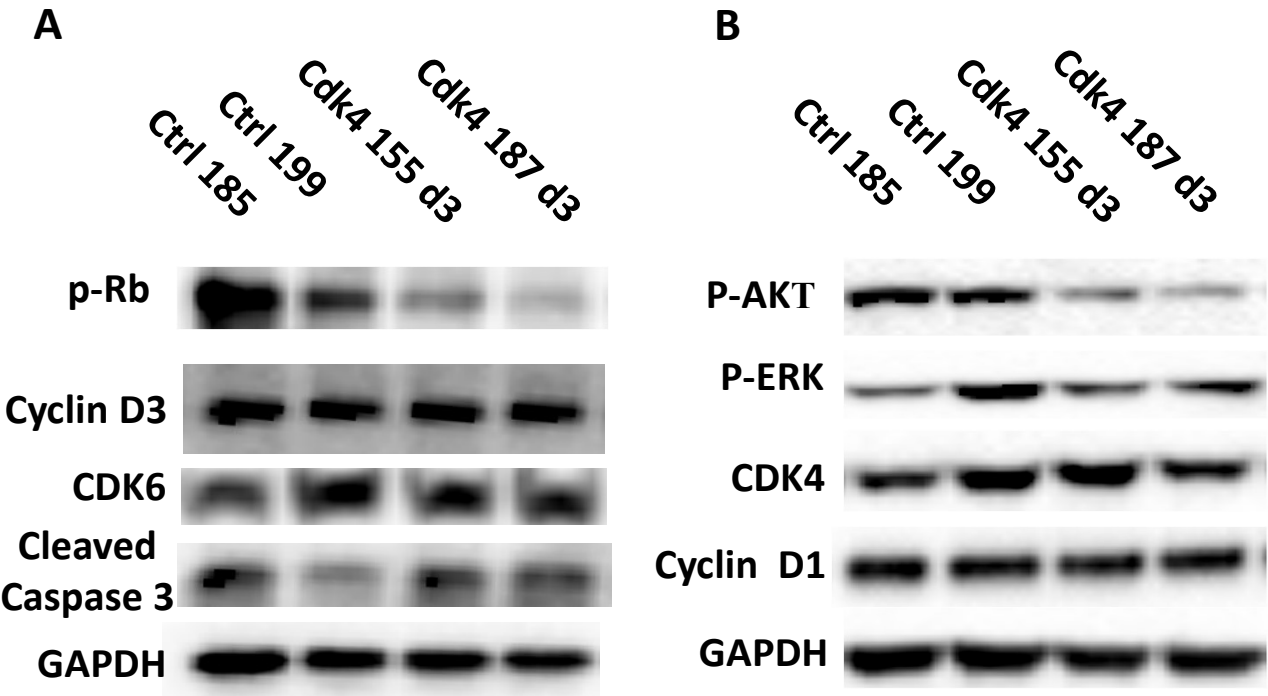

**S-Table 1. Mutual exclusivity or co-occurrence among cell cycle regulators**

| A             | B             | Neither | A Not B | B Not A | Both | Log2 Odds Ratio | p-Value | Tendency           |
|---------------|---------------|---------|---------|---------|------|-----------------|---------|--------------------|
| <b>CDKN2A</b> | <b>CDKN2B</b> | 170     | 36      | 10      | 120  | >3              | <0.001  | Co-occurrence      |
| <b>RB1</b>    | <b>CDKN2B</b> | 132     | 74      | 106     | 24   | -1.308          | <0.001  | Mutual exclusivity |
| <b>CCND1</b>  | <b>CDKN2B</b> | 171     | 35      | 92      | 38   | 1.013           | 0.006   | Co-occurrence      |
| <b>CDKN2A</b> | <b>RB1</b>    | 117     | 121     | 63      | 35   | -0.896          | 0.008   | Mutual exclusivity |
| <b>CDKN2A</b> | <b>CCND1</b>  | 150     | 113     | 30      | 43   | 0.928           | 0.011   | Co-occurrence      |

Among 413 specimens, 336 specimens had the information available of all seven genes. The co-occurrence or mutual exclusivity was analyzed. Only the significant ones were presented in this table.

**S-Table 2. Anti-PD1/PD-L1 antibodies that have been approved for bladder cancer treatment**

| Drug name     | Approved date | Indications | ORR   | Median OS | Median PFS | Grade $\frac{3}{4}$ irAEs |
|---------------|---------------|-------------|-------|-----------|------------|---------------------------|
| Atezolizumab  | May 18, 2016  | 1, 2        | 13.4% | 8.6 mos   | 2.1 mos    | 20%                       |
| Nivolumab     | Feb 2, 2017   | 1           | 19.6% | 8.7 mos   | 2.0 mos    | 18%                       |
| Durvalumab    | May 1, 2017   | 1           | 17.8% | 18.2 mos  | 1.5 mos    | 6.8%                      |
| Avelumab      | May 9, 2017   | 1           | 17%   | 6.2 mos   | 1.5 mos    | 8%                        |
| Pembrolizumab | May 18, 2017  | 1, 2        | 21.1% | 10.3 mos  | 2.1 mos    | 15%                       |

1. Locally advanced or metastatic urothelial carcinoma that has disease progression during or following platinum-containing chemotherapy or has disease progression within 12 months of neoadjuvant or adjuvant treatment with platinum-containing chemotherapy.
2. Locally advanced or metastatic urothelial carcinoma who are not eligible for cisplatin-containing chemotherapy

**Abbreviation:** ORR: overall response rate; OS: Overall survival; PFS: Progression-free survival; irAE: Immune-mediated adverse events.

Five anti-PD1/PD-L1 antibodies have been approved by the FDA for the treatment of advanced bladder cancer after disease progression of cisplatin-based chemotherapy or in those patients who are cisplatin-ineligible.
